# Supplementary material for: The Effect of Annealing Treatment and Atom Layer Deposition to Au/Pt Nanoparticles-Decorated TiO2 Nanorods as Photocatalysts
Source: Molecules. 2018 Feb 9;23(3):525. doi: 10.3390/molecules23030525 (PMC6017365; doi:10.3390/molecules23030525)
Supplement: Supplementary file 1 [file molecules-23-00525-s001.docx]

**Supplementary Materials**

**The Effect of Annealing Treatment and Atom Layer Deposition to Au/Pt Nanoparticles Decorated TiO2 Nanopillars as Photocatalysts**


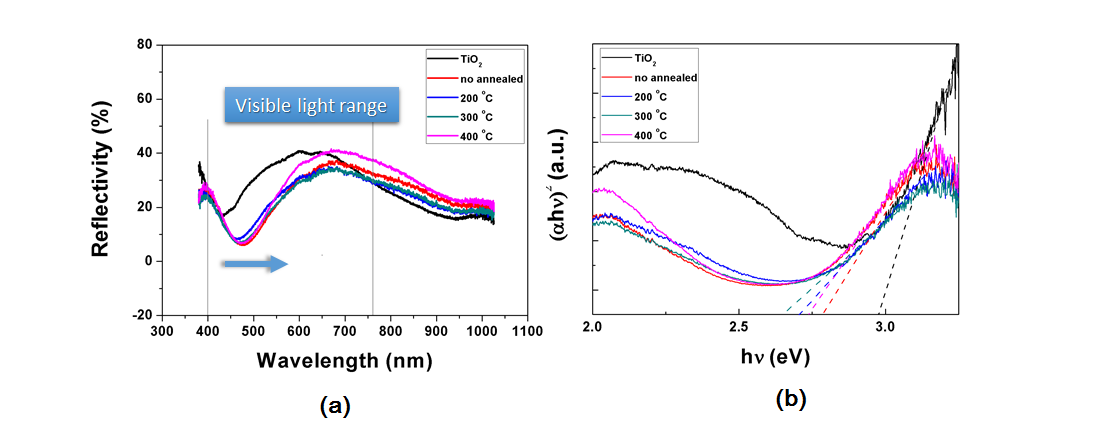


**Figure S1.** (a)UV-vis spectrum and (b) (αEphoton)2 versus Ephoton plots of all typicalsample.
